# Supplementary material for: Probing the geometry reorganization from solution to gas-phase in putrescine derivatives by IRMPD, 1H-NMR and theoretical calculations
Source: Royal Society of Chemistry journal article supplement (doi:10.1039/c7cp04617k), 2017-01-01
Supplement: c7cp04617k1.pdf [file c7cp04617k1.pdf]

## Electronic Supplementary Information

### **Probing the geometry reorganization from solution to gas-phase in putrescine derivatives by IRMPD, <sup>1</sup>H-NMR and theoretical calculations**

Thiago Carita Correra <sup>a\*</sup> André Santos Fernandes,<sup>a</sup> Marcelo Mota Reginato,<sup>a</sup> Lucas Colucci Ducati,<sup>a\*</sup> Giel Berden<sup>b</sup>, Jos Oomens<sup>b</sup>

<sup>a</sup>Department of Fundamental Chemistry, Institute of Chemistry, University of São Paulo, Av. Prof. Lineu Prestes, 748, 05508-000, São Paulo, SP, Brazil

<sup>b</sup>Radboud University, Institute for Molecules and Materials, FELIX Laboratory, Toernooiveld 7c, 6525 ED Nijmegen, The Netherlands

**Figure S1. Oxygen-oxygen radial distribution function ..... 2**

**Calculated geometries ..... 3**

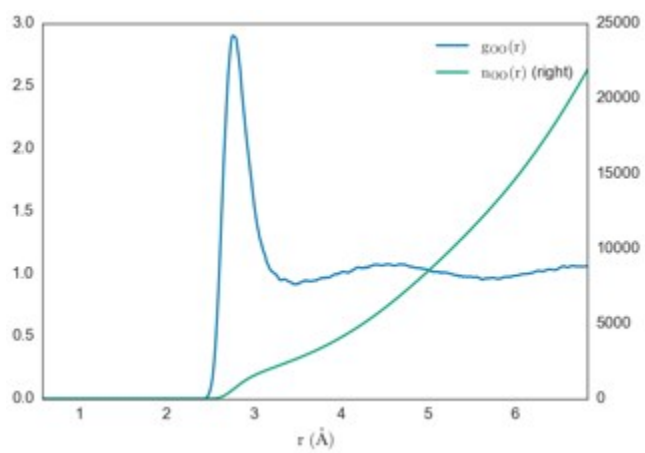

**Figure S1.** Oxygen-oxygen radial distribution function

.....  
(E)-H2Et2-2H+.log  
.....

| Center<br>Number | Atomic<br>Number | Atomic<br>Type | Coordinates (Angstroms) |           |           |
|------------------|------------------|----------------|-------------------------|-----------|-----------|
|                  |                  |                | X                       | Y         | Z         |
| 1                | 6                | 0              | 0.312809                | -0.257750 | 0.370677  |
| 2                | 6                | 0              | -0.488885               | -1.191003 | -0.159469 |
| 3                | 1                | 0              | -0.055356               | 0.729164  | 0.653445  |
| 4                | 1                | 0              | -0.071476               | -2.167806 | -0.404486 |
| 5                | 6                | 0              | 1.750352                | -0.551397 | 0.719502  |
| 6                | 1                | 0              | 2.004524                | -1.595750 | 0.526903  |
| 7                | 1                | 0              | 1.952887                | -0.337254 | 1.773115  |
| 8                | 6                | 0              | -1.962055               | -1.135992 | -0.464549 |
| 9                | 1                | 0              | -2.460881               | -1.993309 | -0.001063 |
| 10               | 1                | 0              | -2.132587               | -1.212425 | -1.544035 |
| 11               | 7                | 0              | 2.746116                | 0.284688  | -0.072603 |
| 12               | 1                | 0              | 2.566665                | 1.283848  | 0.079336  |
| 13               | 7                | 0              | -2.694404               | 0.093105  | 0.010645  |
| 14               | 1                | 0              | -2.553356               | 0.213732  | 1.020468  |
| 15               | 6                | 0              | 4.217705                | 0.009495  | 0.261567  |
| 16               | 6                | 0              | 5.135550                | 0.892810  | -0.568268 |
| 17               | 1                | 0              | 4.375245                | -1.053955 | 0.067136  |
| 18               | 1                | 0              | 4.320869                | 0.192409  | 1.333747  |
| 19               | 1                | 0              | 6.170700                | 0.662051  | -0.301199 |
| 20               | 1                | 0              | 5.028709                | 0.707167  | -1.641902 |
| 21               | 1                | 0              | 4.978550                | 1.957293  | -0.365969 |
| 22               | 6                | 0              | -4.208149               | 0.068442  | -0.260019 |
| 23               | 6                | 0              | -4.866427               | 1.344829  | 0.236780  |
| 24               | 1                | 0              | -4.586799               | -0.821269 | 0.248258  |
| 25               | 1                | 0              | -4.316178               | -0.065360 | -1.338817 |
| 26               | 1                | 0              | -5.938059               | 1.282847  | 0.026913  |
| 27               | 1                | 0              | -4.756240               | 1.473922  | 1.318409  |
| 28               | 1                | 0              | -4.487813               | 2.234107  | -0.277636 |
| 29               | 1                | 0              | -2.309142               | 0.933240  | -0.434512 |
| 30               | 1                | 0              | 2.604799                | 0.126954  | -1.077064 |

.....  
(E)-H2Et2-H+.log  
.....

| Center<br>Number | Atomic<br>Number | Atomic<br>Type | Coordinates (Angstroms) |           |           |
|------------------|------------------|----------------|-------------------------|-----------|-----------|
|                  |                  |                | X                       | Y         | Z         |
| 1                | 6                | 0              | 0.547437                | -1.391203 | -0.208778 |
| 2                | 6                | 0              | -0.208179               | -0.524281 | 0.480959  |
| 3                | 1                | 0              | 0.108593                | -2.322820 | -0.570672 |
| 4                | 1                | 0              | 0.245713                | 0.391580  | 0.855714  |
| 5                | 6                | 0              | 2.004415                | -1.201690 | -0.524897 |
| 6                | 1                | 0              | 2.094342                | -1.094995 | -1.616264 |

|    |   |   |           |           |           |
|----|---|---|-----------|-----------|-----------|
| 7  | 1 | 0 | 2.534219  | -2.144170 | -0.287572 |
| 8  | 6 | 0 | -1.652427 | -0.760167 | 0.781306  |
| 9  | 1 | 0 | -1.985472 | -1.761254 | 0.497582  |
| 10 | 1 | 0 | -1.906871 | -0.584671 | 1.830888  |
| 11 | 7 | 0 | 2.583751  | -0.024112 | 0.101270  |
| 12 | 1 | 0 | 2.687979  | -0.188841 | 1.101515  |
| 13 | 7 | 0 | -2.527116 | 0.219609  | -0.014964 |
| 14 | 1 | 0 | -2.214944 | 1.174102  | 0.195493  |
| 15 | 6 | 0 | 3.893162  | 0.359577  | -0.453105 |
| 16 | 6 | 0 | 4.479670  | 1.545955  | 0.305288  |
| 17 | 1 | 0 | 3.739472  | 0.628425  | -1.505231 |
| 18 | 1 | 0 | 4.607294  | -0.482178 | -0.438678 |
| 19 | 1 | 0 | 5.439812  | 1.839586  | -0.128895 |
| 20 | 1 | 0 | 3.804839  | 2.406669  | 0.266379  |
| 21 | 1 | 0 | 4.658271  | 1.296737  | 1.358094  |
| 22 | 6 | 0 | -4.020964 | 0.117712  | 0.221319  |
| 23 | 6 | 0 | -4.783825 | 1.140067  | -0.609197 |
| 24 | 1 | 0 | -4.171441 | 0.264559  | 1.293429  |
| 25 | 1 | 0 | -4.301162 | -0.908089 | -0.029545 |
| 26 | 1 | 0 | -5.853134 | 1.032164  | -0.408994 |
| 27 | 1 | 0 | -4.504023 | 2.166783  | -0.351497 |
| 28 | 1 | 0 | -4.634070 | 0.988958  | -1.683118 |
| 29 | 1 | 0 | -2.322472 | 0.085319  | -1.011400 |

.....  
 (E)-Me4-2H+.log  
 .....

| Center<br>Number | Atomic<br>Number | Atomic<br>Type | Coordinates (Angstroms) |           |           |
|------------------|------------------|----------------|-------------------------|-----------|-----------|
|                  |                  |                | X                       | Y         | Z         |
| 1                | 1                | 0              | 0.437541                | -0.210850 | -1.458615 |
| 2                | 1                | 0              | -0.437694               | 0.211304  | 1.459038  |
| 3                | 6                | 0              | 0.522394                | -0.194867 | -0.370867 |
| 4                | 6                | 0              | -0.522549               | 0.195315  | 0.371290  |
| 5                | 6                | 0              | 1.811212                | -0.712693 | 0.210840  |
| 6                | 1                | 0              | 1.945605                | -1.766290 | -0.055482 |
| 7                | 1                | 0              | 1.838715                | -0.625537 | 1.299618  |
| 8                | 6                | 0              | -1.811374               | 0.713131  | -0.210406 |
| 9                | 1                | 0              | -1.945834               | 1.766694  | 0.056015  |
| 10               | 1                | 0              | -1.838836               | 0.626078  | -1.299193 |
| 11               | 7                | 0              | 3.050494                | 0.007107  | -0.313504 |
| 12               | 7                | 0              | -3.050631               | -0.006795 | 0.313828  |
| 13               | 1                | 0              | 3.010033                | -0.018403 | -1.338488 |
| 14               | 1                | 0              | -3.010260               | 0.018709  | 1.338815  |
| 15               | 6                | 0              | 4.314144                | -0.723657 | 0.088147  |
| 16               | 1                | 0              | 5.169323                | -0.196521 | -0.335384 |
| 17               | 1                | 0              | 4.380231                | -0.730084 | 1.176792  |
| 18               | 1                | 0              | 4.273649                | -1.742953 | -0.297079 |
| 19               | 6                | 0              | 3.104901                | 1.459348  | 0.093620  |
| 20               | 1                | 0              | 3.976000                | 1.919087  | -0.374009 |
| 21               | 1                | 0              | 2.195341                | 1.959765  | -0.236778 |

|    |   |   |           |           |           |
|----|---|---|-----------|-----------|-----------|
| 22 | 1 | 0 | 3.195452  | 1.509950  | 1.179620  |
| 23 | 6 | 0 | -4.314326 | 0.723829  | -0.087940 |
| 24 | 1 | 0 | -4.274006 | 1.743114  | 0.297334  |
| 25 | 1 | 0 | -4.380287 | 0.730294  | -1.176592 |
| 26 | 1 | 0 | -5.169490 | 0.196570  | 0.335468  |
| 27 | 6 | 0 | -3.104844 | -1.459044 | -0.093298 |
| 28 | 1 | 0 | -3.975923 | -1.918878 | 0.374274  |
| 29 | 1 | 0 | -3.195315 | -1.509655 | -1.179304 |
| 30 | 1 | 0 | -2.195248 | -1.959352 | 0.237167  |

.....  
 (E)-Me4-H+.log

.....

-----  
 Center Atomic Atomic Coordinates (Angstroms)  
 Number Number Type X Y Z

|    |   |   |           |           |           |
|----|---|---|-----------|-----------|-----------|
| 1  | 6 | 0 | -0.264989 | 0.399223  | -0.187933 |
| 2  | 6 | 0 | 0.533321  | -0.144049 | -1.116694 |
| 3  | 1 | 0 | 0.155441  | 0.628527  | 0.790958  |
| 4  | 1 | 0 | 0.139330  | -0.355194 | -2.112508 |
| 5  | 6 | 0 | -1.684998 | 0.782392  | -0.443747 |
| 6  | 6 | 0 | 1.981423  | -0.504349 | -0.907893 |
| 7  | 1 | 0 | -1.877347 | 1.831420  | -0.197447 |
| 8  | 1 | 0 | -1.996306 | 0.600386  | -1.475786 |
| 9  | 1 | 0 | 2.558914  | -0.160089 | -1.788659 |
| 10 | 1 | 0 | 2.046636  | -1.601165 | -0.935685 |
| 11 | 7 | 0 | -2.665661 | -0.015285 | 0.441316  |
| 12 | 7 | 0 | 2.537739  | -0.025018 | 0.350258  |
| 13 | 6 | 0 | -4.042981 | 0.586009  | 0.431534  |
| 14 | 1 | 0 | -3.982465 | 1.620057  | 0.772256  |
| 15 | 1 | 0 | -4.689521 | 0.010012  | 1.094441  |
| 16 | 1 | 0 | -4.428975 | 0.550865  | -0.588125 |
| 17 | 6 | 0 | -2.694449 | -1.477108 | 0.090730  |
| 18 | 1 | 0 | -3.114632 | -1.581643 | -0.910675 |
| 19 | 1 | 0 | -1.675893 | -1.861982 | 0.113324  |
| 20 | 1 | 0 | -3.318057 | -2.001634 | 0.815389  |
| 21 | 6 | 0 | 2.984010  | 1.368121  | 0.254328  |
| 22 | 1 | 0 | 2.167764  | 2.006942  | -0.094444 |
| 23 | 1 | 0 | 3.293836  | 1.721769  | 1.241519  |
| 24 | 1 | 0 | 3.835049  | 1.490452  | -0.439537 |
| 25 | 6 | 0 | 3.614262  | -0.886846 | 0.846800  |
| 26 | 1 | 0 | 3.950072  | -0.519123 | 1.820148  |
| 27 | 1 | 0 | 4.488573  | -0.915973 | 0.172359  |
| 28 | 1 | 0 | 3.244750  | -1.907700 | 0.980748  |
| 29 | 1 | 0 | -2.303900 | 0.055865  | 1.398021  |

.....  
 PES\_(E)-Me4-H+.log

.....

-----  
 Center Atomic Atomic Coordinates (Angstroms)

| Number | Number | Type | X         | Y         | Z         |
|--------|--------|------|-----------|-----------|-----------|
| 1      | 6      | 0    | 0.152599  | 2.237536  | -0.706969 |
| 2      | 6      | 0    | -0.758999 | 1.783498  | 0.143805  |
| 3      | 1      | 0    | 0.456753  | 3.278445  | -0.671189 |
| 4      | 1      | 0    | -1.046756 | 0.736927  | 0.101493  |
| 5      | 6      | 0    | 0.816679  | 1.357227  | -1.714346 |
| 6      | 6      | 0    | -1.433744 | 2.650520  | 1.160048  |
| 7      | 1      | 0    | 1.901207  | 1.467699  | -1.701314 |
| 8      | 1      | 0    | 0.558960  | 0.312989  | -1.551067 |
| 9      | 1      | 0    | -2.525502 | 2.561361  | 1.033451  |
| 10     | 1      | 0    | -1.166852 | 3.691334  | 0.976292  |
| 11     | 7      | 0    | 0.398038  | 1.681543  | -3.122017 |
| 12     | 7      | 0    | -1.068231 | 2.327159  | 2.542673  |
| 13     | 1      | 0    | -0.620486 | 1.590639  | -3.160103 |
| 14     | 6      | 0    | 0.984400  | 0.705359  | -4.076027 |
| 15     | 1      | 0    | 0.615560  | 0.933348  | -5.071399 |
| 16     | 1      | 0    | 2.065915  | 0.808628  | -4.038263 |
| 17     | 1      | 0    | 0.686641  | -0.295757 | -3.779240 |
| 18     | 6      | 0    | 0.744920  | 3.073778  | -3.511776 |
| 19     | 1      | 0    | 1.816705  | 3.201168  | -3.380355 |
| 20     | 1      | 0    | 0.469295  | 3.215094  | -4.552445 |
| 21     | 1      | 0    | 0.197166  | 3.769455  | -2.885130 |
| 22     | 6      | 0    | -1.514843 | 0.983550  | 2.892095  |
| 23     | 1      | 0    | -1.302933 | 0.794606  | 3.943241  |
| 24     | 1      | 0    | -2.595544 | 0.858371  | 2.728749  |
| 25     | 1      | 0    | -0.987669 | 0.235901  | 2.302995  |
| 26     | 6      | 0    | -1.723975 | 3.285687  | 3.423633  |
| 27     | 1      | 0    | -2.819266 | 3.238890  | 3.333336  |
| 28     | 1      | 0    | -1.457871 | 3.078673  | 4.458998  |
| 29     | 1      | 0    | -1.403182 | 4.297253  | 3.178247  |

.....  
PES\_I-1.log  
.....

| Center Number | Atomic Number | Atomic Type | Coordinates (Angstroms) |           |           |
|---------------|---------------|-------------|-------------------------|-----------|-----------|
|               |               |             | X                       | Y         | Z         |
| 1             | 6             | 0           | -0.764811               | -1.054558 | -0.189736 |
| 2             | 1             | 0           | -1.167413               | 0.630169  | -1.165332 |
| 3             | 6             | 0           | 1.378663                | 0.244360  | 0.051007  |
| 4             | 6             | 0           | -1.563328               | 0.132879  | -0.252332 |
| 5             | 1             | 0           | 1.312076                | 0.786884  | -0.891404 |
| 6             | 1             | 0           | 0.965612                | 0.859576  | 0.847458  |
| 7             | 1             | 0           | -1.227007               | 0.827593  | 0.545502  |
| 8             | 1             | 0           | -1.248142               | -2.023821 | -0.292816 |
| 9             | 7             | 0           | 2.830746                | 0.084766  | 0.353075  |
| 10            | 7             | 0           | -2.989335               | -0.050187 | -0.322443 |
| 11            | 1             | 0           | 2.914201                | -0.384953 | 1.259426  |
| 12            | 6             | 0           | 3.466416                | 1.426312  | 0.479458  |
| 13            | 1             | 0           | 4.508105                | 1.285585  | 0.749309  |

|    |   |   |           |           |           |
|----|---|---|-----------|-----------|-----------|
| 14 | 1 | 0 | 3.385131  | 1.923896  | -0.483475 |
| 15 | 1 | 0 | 2.944626  | 1.988558  | 1.247626  |
| 16 | 6 | 0 | 3.551997  | -0.741150 | -0.653401 |
| 17 | 1 | 0 | 3.380062  | -0.301422 | -1.632863 |
| 18 | 1 | 0 | 4.608985  | -0.722407 | -0.407018 |
| 19 | 1 | 0 | 3.185222  | -1.761161 | -0.616276 |
| 20 | 6 | 0 | -3.614905 | 1.249690  | -0.573769 |
| 21 | 1 | 0 | -4.693795 | 1.123378  | -0.624987 |
| 22 | 1 | 0 | -3.384247 | 1.968431  | 0.222757  |
| 23 | 1 | 0 | -3.264991 | 1.654244  | -1.521857 |
| 24 | 6 | 0 | -3.475578 | -0.581959 | 0.953156  |
| 25 | 1 | 0 | -3.260503 | 0.103375  | 1.783070  |
| 26 | 1 | 0 | -4.551118 | -0.730932 | 0.891980  |
| 27 | 1 | 0 | -3.011396 | -1.544865 | 1.164675  |
| 28 | 6 | 0 | 0.663778  | -1.085494 | -0.034819 |
| 29 | 1 | 0 | 1.018755  | -1.739019 | -0.847146 |
| 30 | 1 | 0 | 0.821826  | -1.722869 | 0.856164  |

.....  
PES\_l1.log  
.....

| Center<br>Number | Atomic<br>Number | Atomic<br>Type | Coordinates (Angstroms) |           |           |
|------------------|------------------|----------------|-------------------------|-----------|-----------|
|                  |                  |                | X                       | Y         | Z         |
| 1                | 6                | 0              | 0.886071                | -0.845800 | -0.308636 |
| 2                | 1                | 0              | 0.484953                | -0.810628 | -1.314546 |
| 3                | 6                | 0              | -1.181948               | -0.149701 | 1.008558  |
| 4                | 6                | 0              | 2.327086                | -1.160851 | -0.207673 |
| 5                | 1                | 0              | -1.921356               | -0.532941 | 1.709118  |
| 6                | 1                | 0              | -0.765257               | 0.770743  | 1.411485  |
| 7                | 1                | 0              | 2.886050                | -1.393348 | -1.101498 |
| 8                | 1                | 0              | 2.697323                | -1.560843 | 0.725425  |
| 9                | 7                | 0              | -1.938086               | 0.242780  | -0.222888 |
| 10               | 7                | 0              | 1.883681                | 0.241308  | -0.115768 |
| 11               | 1                | 0              | -1.279277               | 0.649523  | -0.892673 |
| 12               | 6                | 0              | -2.930336               | 1.301655  | 0.107670  |
| 13               | 1                | 0              | -3.423179               | 1.609869  | -0.809195 |
| 14               | 1                | 0              | -3.650075               | 0.879599  | 0.804411  |
| 15               | 1                | 0              | -2.407581               | 2.138902  | 0.560149  |
| 16               | 6                | 0              | -2.601712               | -0.911324 | -0.884868 |
| 17               | 1                | 0              | -3.248246               | -1.389998 | -0.153554 |
| 18               | 1                | 0              | -3.184391               | -0.532290 | -1.718865 |
| 19               | 1                | 0              | -1.850584               | -1.605969 | -1.246899 |
| 20               | 6                | 0              | 2.142946                | 1.116146  | -1.274265 |
| 21               | 1                | 0              | 1.404829                | 1.914765  | -1.269176 |
| 22               | 1                | 0              | 3.146239                | 1.522856  | -1.173821 |
| 23               | 1                | 0              | 2.063575                | 0.531536  | -2.185756 |
| 24               | 6                | 0              | 2.019667                | 0.938632  | 1.176899  |
| 25               | 1                | 0              | 3.044808                | 1.292304  | 1.252653  |
| 26               | 1                | 0              | 1.333663                | 1.781712  | 1.187492  |
| 27               | 1                | 0              | 1.806508                | 0.258239  | 1.993628  |

|    |   |   |           |           |          |
|----|---|---|-----------|-----------|----------|
| 28 | 6 | 0 | -0.098699 | -1.189692 | 0.773637 |
| 29 | 1 | 0 | 0.403986  | -1.348943 | 1.726175 |
| 30 | 1 | 0 | -0.538407 | -2.148811 | 0.498352 |

.....  
PES\_I-2.log  
.....

| Center<br>Number | Atomic<br>Number | Atomic<br>Type | Coordinates (Angstroms) |           |           |
|------------------|------------------|----------------|-------------------------|-----------|-----------|
|                  |                  |                | X                       | Y         | Z         |
| 1                | 6                | 0              | -0.432930               | 1.521589  | -0.573631 |
| 2                | 1                | 0              | -0.145907               | 0.965505  | -1.462451 |
| 3                | 6                | 0              | 1.324992                | 0.484512  | 0.978651  |
| 4                | 6                | 0              | -1.550657               | 0.907282  | 0.175561  |
| 5                | 1                | 0              | 2.200924                | 0.709165  | 1.585096  |
| 6                | 1                | 0              | 0.588284                | -0.016361 | 1.606304  |
| 7                | 1                | 0              | -0.795880               | 2.498096  | -0.904297 |
| 8                | 1                | 0              | -1.871617               | 1.429443  | 1.072114  |
| 9                | 7                | 0              | 1.769968                | -0.532456 | -0.029828 |
| 10               | 7                | 0              | -2.180006               | -0.172790 | -0.087239 |
| 11               | 1                | 0              | 0.957016                | -0.817737 | -0.583665 |
| 12               | 6                | 0              | 2.275290                | -1.750255 | 0.658957  |
| 13               | 1                | 0              | 2.517599                | -2.494841 | -0.092883 |
| 14               | 1                | 0              | 3.163248                | -1.473552 | 1.221522  |
| 15               | 1                | 0              | 1.501225                | -2.118637 | 1.325475  |
| 16               | 6                | 0              | 2.790005                | 0.003067  | -0.969621 |
| 17               | 1                | 0              | 3.610225                | 0.404660  | -0.379387 |
| 18               | 1                | 0              | 3.135789                | -0.813220 | -1.596350 |
| 19               | 1                | 0              | 2.343604                | 0.777684  | -1.584451 |
| 20               | 6                | 0              | -1.933488               | -1.050286 | -1.233301 |
| 21               | 1                | 0              | -1.740551               | -2.049232 | -0.848165 |
| 22               | 1                | 0              | -2.836852               | -1.069362 | -1.839186 |
| 23               | 1                | 0              | -1.096276               | -0.707451 | -1.826145 |
| 24               | 6                | 0              | -3.258139               | -0.649953 | 0.786110  |
| 25               | 1                | 0              | -4.162911               | -0.745321 | 0.190405  |
| 26               | 1                | 0              | -2.973697               | -1.626845 | 1.170377  |
| 27               | 1                | 0              | -3.408705               | 0.050851  | 1.599644  |
| 28               | 6                | 0              | 0.760688                | 1.752568  | 0.365790  |
| 29               | 1                | 0              | 0.449145                | 2.383437  | 1.198652  |
| 30               | 1                | 0              | 1.530150                | 2.298948  | -0.175752 |

.....  
PES\_I2.log  
.....

| Center<br>Number | Atomic<br>Number | Atomic<br>Type | Coordinates (Angstroms) |           |           |
|------------------|------------------|----------------|-------------------------|-----------|-----------|
|                  |                  |                | X                       | Y         | Z         |
| 1                | 6                | 0              | -0.409111               | 0.117798  | -0.524534 |
| 2                | 1                | 0              | -0.489848               | -0.845170 | -1.026258 |
| 3                | 6                | 0              | 1.688884                | -0.713822 | 0.642683  |



|    |   |   |           |           |           |
|----|---|---|-----------|-----------|-----------|
| 4  | 6 | 0 | -1.742985 | 0.712375  | -0.283479 |
| 5  | 1 | 0 | 2.205363  | -0.780334 | 1.598842  |
| 6  | 1 | 0 | 1.568708  | -1.715192 | 0.232956  |
| 7  | 1 | 0 | 0.120705  | 0.808168  | -1.183311 |
| 8  | 1 | 0 | -1.835544 | 1.791789  | -0.238129 |
| 9  | 7 | 0 | 2.625088  | 0.002559  | -0.282533 |
| 10 | 7 | 0 | -2.817648 | 0.048210  | -0.101028 |
| 11 | 1 | 0 | 2.209444  | 0.008885  | -1.217662 |
| 12 | 6 | 0 | 3.911551  | -0.737912 | -0.382786 |
| 13 | 1 | 0 | 4.529167  | -0.252217 | -1.131874 |
| 14 | 1 | 0 | 4.393930  | -0.702351 | 0.590472  |
| 15 | 1 | 0 | 3.699375  | -1.763963 | -0.667841 |
| 16 | 6 | 0 | 2.857865  | 1.414919  | 0.117736  |
| 17 | 1 | 0 | 3.207738  | 1.418512  | 1.147031  |
| 18 | 1 | 0 | 3.609670  | 1.836644  | -0.542479 |
| 19 | 1 | 0 | 1.931145  | 1.971975  | 0.025277  |
| 20 | 6 | 0 | -2.879132 | -1.418226 | -0.103346 |
| 21 | 1 | 0 | -3.657911 | -1.715929 | 0.592105  |
| 22 | 1 | 0 | -3.137884 | -1.759679 | -1.103661 |
| 23 | 1 | 0 | -1.931084 | -1.839891 | 0.209299  |
| 24 | 6 | 0 | -4.107206 | 0.716373  | 0.092822  |
| 25 | 1 | 0 | -4.797036 | 0.341639  | -0.660632 |
| 26 | 1 | 0 | -4.483908 | 0.462526  | 1.080658  |
| 27 | 1 | 0 | -3.979780 | 1.788469  | -0.006358 |
| 28 | 6 | 0 | 0.343153  | -0.035901 | 0.809058  |
| 29 | 1 | 0 | -0.238090 | -0.673596 | 1.476585  |
| 30 | 1 | 0 | 0.445644  | 0.930719  | 1.300977  |

.....  
PES\_TS-1.log  
.....

| Center<br>Number | Atomic<br>Number | Atomic<br>Type | Coordinates (Angstroms) |           |           |
|------------------|------------------|----------------|-------------------------|-----------|-----------|
|                  |                  |                | X                       | Y         | Z         |
| 1                | 6                | 0              | -0.729537               | -0.359210 | -0.455963 |
| 2                | 1                | 0              | -1.124327               | -1.046794 | -1.199904 |
| 3                | 6                | 0              | 1.030354                | 0.146736  | 1.280503  |
| 4                | 6                | 0              | -1.553672               | 0.706762  | -0.053515 |
| 5                | 1                | 0              | 1.218299                | 1.184945  | 1.010959  |
| 6                | 1                | 0              | 0.290120                | 0.111713  | 2.078266  |
| 7                | 1                | 0              | -1.075142               | 1.516259  | 0.510093  |
| 8                | 1                | 0              | -1.856867               | -0.043104 | 0.777405  |
| 9                | 7                | 0              | 2.297837                | -0.388919 | 1.853688  |
| 10               | 7                | 0              | -2.685327               | 1.049111  | -0.853616 |
| 11               | 1                | 0              | 2.137461                | -1.371043 | 2.096805  |
| 12               | 6                | 0              | 2.641676                | 0.331655  | 3.111110  |
| 13               | 1                | 0              | 3.530627                | -0.127690 | 3.531772  |
| 14               | 1                | 0              | 2.831005                | 1.371980  | 2.859661  |
| 15               | 1                | 0              | 1.805753                | 0.249324  | 3.799068  |
| 16               | 6                | 0              | 3.432816                | -0.335969 | 0.892715  |
| 17               | 1                | 0              | 3.548619                | 0.695865  | 0.570575  |

|    |   |   |           |           |           |
|----|---|---|-----------|-----------|-----------|
| 18 | 1 | 0 | 4.324967  | -0.678367 | 1.407320  |
| 19 | 1 | 0 | 3.225553  | -0.983290 | 0.047254  |
| 20 | 6 | 0 | -2.225896 | 1.829959  | -2.008755 |
| 21 | 1 | 0 | -3.087186 | 2.089980  | -2.619763 |
| 22 | 1 | 0 | -1.721953 | 2.753092  | -1.698225 |
| 23 | 1 | 0 | -1.540325 | 1.234878  | -2.609913 |
| 24 | 6 | 0 | -3.618018 | 1.844240  | -0.052034 |
| 25 | 1 | 0 | -3.153251 | 2.770203  | 0.307398  |
| 26 | 1 | 0 | -4.480083 | 2.100636  | -0.663169 |
| 27 | 1 | 0 | -3.956182 | 1.264007  | 0.804483  |
| 28 | 6 | 0 | 0.573684  | -0.679193 | 0.095185  |
| 29 | 1 | 0 | 1.212096  | -0.525767 | -0.795689 |
| 30 | 1 | 0 | 0.628210  | -1.756679 | 0.280710  |

.....  
PES\_TS1.log  
.....

| Center<br>Number | Atomic<br>Number | Atomic<br>Type | Coordinates (Angstroms) |           |           |
|------------------|------------------|----------------|-------------------------|-----------|-----------|
|                  |                  |                | X                       | Y         | Z         |
| 1                | 6                | 0              | 0.699800                | 0.425470  | -0.555326 |
| 2                | 1                | 0              | 0.750834                | 0.073701  | -1.584783 |
| 3                | 6                | 0              | -1.579524               | -0.358345 | -0.285878 |
| 4                | 6                | 0              | 1.902454                | 0.585029  | 0.166402  |
| 5                | 1                | 0              | -1.774192               | -0.489288 | -1.348572 |
| 6                | 1                | 0              | -1.190274               | -1.284388 | 0.129515  |
| 7                | 1                | 0              | 1.767764                | 0.614525  | 1.256697  |
| 8                | 1                | 0              | 1.885931                | 1.693097  | -0.114691 |
| 9                | 7                | 0              | -2.888094               | -0.112797 | 0.378744  |
| 10               | 7                | 0              | 3.085188                | -0.049864 | -0.325910 |
| 11               | 1                | 0              | -2.714355               | -0.024810 | 1.384587  |
| 12               | 6                | 0              | -3.779874               | -1.288572 | 0.175476  |
| 13               | 1                | 0              | -4.692077               | -1.123455 | 0.739669  |
| 14               | 1                | 0              | -3.995809               | -1.363542 | -0.887046 |
| 15               | 1                | 0              | -3.266892               | -2.178438 | 0.527091  |
| 16               | 6                | 0              | -3.553782               | 1.135678  | -0.080044 |
| 17               | 1                | 0              | -3.643146               | 1.089949  | -1.162507 |
| 18               | 1                | 0              | -4.535525               | 1.178964  | 0.380926  |
| 19               | 1                | 0              | -2.967879               | 1.995884  | 0.226277  |
| 20               | 6                | 0              | 2.986550                | -1.490237 | -0.063706 |
| 21               | 1                | 0              | 3.890268                | -1.977093 | -0.422508 |
| 22               | 1                | 0              | 2.875056                | -1.698294 | 1.007629  |
| 23               | 1                | 0              | 2.132491                | -1.908162 | -0.595384 |
| 24               | 6                | 0              | 4.252133                | 0.498536  | 0.367772  |
| 25               | 1                | 0              | 4.191949                | 0.335000  | 1.450698  |
| 26               | 1                | 0              | 5.148971                | 0.011512  | -0.007390 |
| 27               | 1                | 0              | 4.329316                | 1.567279  | 0.177504  |
| 28               | 6                | 0              | -0.608648               | 0.804983  | -0.039165 |
| 29               | 1                | 0              | -0.920939               | 1.662365  | -0.651796 |
| 30               | 1                | 0              | -0.565813               | 1.088573  | 1.011063  |

.....  
PES\_TS2.log

.....

| Center<br>Number | Atomic<br>Number | Atomic<br>Type | Coordinates (Angstroms) |           |           |
|------------------|------------------|----------------|-------------------------|-----------|-----------|
|                  |                  |                | X                       | Y         | Z         |
| 1                | 6                | 0              | -0.635896               | -0.254993 | 0.280732  |
| 2                | 1                | 0              | -1.028376               | 0.609563  | 0.814819  |
| 3                | 6                | 0              | 1.685388                | 0.772092  | 0.416482  |
| 4                | 6                | 0              | -1.636432               | -0.804080 | -0.665356 |
| 5                | 1                | 0              | 2.592197                | 0.986700  | -0.146768 |
| 6                | 1                | 0              | 1.306391                | 1.697798  | 0.845603  |
| 7                | 1                | 0              | -0.429539               | -1.041353 | 1.007062  |
| 8                | 1                | 0              | -1.681516               | -1.877609 | -0.810525 |
| 9                | 7                | 0              | 2.109950                | -0.078570 | 1.574528  |
| 10               | 7                | 0              | -2.449076               | -0.115543 | -1.369936 |
| 11               | 1                | 0              | 1.295250                | -0.227352 | 2.175195  |
| 12               | 6                | 0              | 3.125754                | 0.643843  | 2.387238  |
| 13               | 1                | 0              | 3.370562                | 0.036792  | 3.253281  |
| 14               | 1                | 0              | 4.005153                | 0.794865  | 1.766806  |
| 15               | 1                | 0              | 2.708079                | 1.597676  | 2.695326  |
| 16               | 6                | 0              | 2.617743                | -1.410423 | 1.152700  |
| 17               | 1                | 0              | 3.427651                | -1.251235 | 0.444726  |
| 18               | 1                | 0              | 2.980125                | -1.931005 | 2.033871  |
| 19               | 1                | 0              | 1.812548                | -1.975854 | 0.694594  |
| 20               | 6                | 0              | -2.525559               | 1.346186  | -1.369870 |
| 21               | 1                | 0              | -2.233603               | 1.693282  | -2.359072 |
| 22               | 1                | 0              | -3.558689               | 1.628833  | -1.182064 |
| 23               | 1                | 0              | -1.876063               | 1.775350  | -0.617907 |
| 24               | 6                | 0              | -3.389993               | -0.756924 | -2.294154 |
| 25               | 1                | 0              | -4.400479               | -0.507921 | -1.978346 |
| 26               | 1                | 0              | -3.216697               | -0.358225 | -3.290864 |
| 27               | 1                | 0              | -3.239503               | -1.830596 | -2.279673 |
| 28               | 6                | 0              | 0.645178                | 0.128567  | -0.478651 |
| 29               | 1                | 0              | 0.406242                | 0.867266  | -1.244610 |
| 30               | 1                | 0              | 1.053471                | -0.739756 | -0.994578 |

.....

.....  
PES\_(Z)-Me4-H+.log

.....

| Center<br>Number | Atomic<br>Number | Atomic<br>Type | Coordinates (Angstroms) |          |           |
|------------------|------------------|----------------|-------------------------|----------|-----------|
|                  |                  |                | X                       | Y        | Z         |
| 1                | 6                | 0              | 0.256056                | 1.980933 | -0.537131 |
| 2                | 6                | 0              | -0.998597               | 1.820146 | -0.126510 |
| 3                | 1                | 0              | 0.473627                | 2.693058 | -1.322925 |
| 4                | 1                | 0              | -1.777247               | 2.413193 | -0.591141 |
| 5                | 6                | 0              | 1.416555                | 1.208588 | 0.027415  |
| 6                | 6                | 0              | -1.414574               | 0.845366 | 0.945903  |
| 7                | 1                | 0              | 2.369446                | 1.575793 | -0.349027 |

|    |   |   |           |           |           |
|----|---|---|-----------|-----------|-----------|
| 8  | 1 | 0 | 1.425889  | 1.262566  | 1.116766  |
| 9  | 1 | 0 | -2.458297 | 1.020513  | 1.230604  |
| 10 | 1 | 0 | -0.799646 | 0.996420  | 1.836849  |
| 11 | 7 | 0 | 1.331768  | -0.245173 | -0.315352 |
| 12 | 7 | 0 | -1.236696 | -0.556552 | 0.528871  |
| 13 | 1 | 0 | 0.342603  | -0.535850 | -0.005801 |
| 14 | 6 | 0 | 2.316868  | -1.035959 | 0.450033  |
| 15 | 1 | 0 | 2.204108  | -2.083568 | 0.183900  |
| 16 | 1 | 0 | 3.319239  | -0.693267 | 0.199578  |
| 17 | 1 | 0 | 2.128372  | -0.898763 | 1.511782  |
| 18 | 6 | 0 | 1.451949  | -0.485447 | -1.768986 |
| 19 | 1 | 0 | 2.438963  | -0.165754 | -2.098547 |
| 20 | 1 | 0 | 1.321114  | -1.548051 | -1.955684 |
| 21 | 1 | 0 | 0.682117  | 0.078405  | -2.289227 |
| 22 | 6 | 0 | -2.133948 | -0.896570 | -0.572688 |
| 23 | 1 | 0 | -1.954694 | -1.925950 | -0.879890 |
| 24 | 1 | 0 | -3.185182 | -0.795136 | -0.274468 |
| 25 | 1 | 0 | -1.947216 | -0.241173 | -1.422950 |
| 26 | 6 | 0 | -1.443585 | -1.452841 | 1.661604  |
| 27 | 1 | 0 | -2.458073 | -1.357500 | 2.068673  |
| 28 | 1 | 0 | -1.293267 | -2.482887 | 1.341110  |
| 29 | 1 | 0 | -0.727169 | -1.221960 | 2.449556  |

.....  
 (Z)-H2Et2-2H+.log  
 .....

| Center<br>Number | Atomic<br>Number | Atomic<br>Type | Coordinates (Angstroms)<br>X Y Z |           |           |
|------------------|------------------|----------------|----------------------------------|-----------|-----------|
| 1                | 1                | 0              | -1.137981                        | -2.284364 | 0.694815  |
| 2                | 1                | 0              | 1.094782                         | -2.520547 | 0.195689  |
| 3                | 6                | 0              | -0.629772                        | -1.390144 | 0.333533  |
| 4                | 6                | 0              | 0.677675                         | -1.521639 | 0.065664  |
| 5                | 6                | 0              | -1.496802                        | -0.161104 | 0.246196  |
| 6                | 6                | 0              | 1.651160                         | -0.488027 | -0.439005 |
| 7                | 1                | 0              | -1.030985                        | 0.679618  | -0.270787 |
| 8                | 1                | 0              | -1.800531                        | 0.168528  | 1.243828  |
| 9                | 1                | 0              | 1.941300                         | -0.700507 | -1.473900 |
| 10               | 1                | 0              | 1.280489                         | 0.535304  | -0.385664 |
| 11               | 7                | 0              | -2.781866                        | -0.467400 | -0.506936 |
| 12               | 7                | 0              | 2.941284                         | -0.533141 | 0.364974  |
| 13               | 1                | 0              | -2.544289                        | -0.812612 | -1.443849 |
| 14               | 1                | 0              | -3.268568                        | -1.242882 | -0.040728 |
| 15               | 1                | 0              | 3.284685                         | -1.500576 | 0.381831  |
| 16               | 1                | 0              | 2.741687                         | -0.293010 | 1.343452  |
| 17               | 6                | 0              | -3.775490                        | 0.698387  | -0.651106 |
| 18               | 6                | 0              | 4.083432                         | 0.364987  | -0.137960 |
| 19               | 1                | 0              | -4.528500                        | 0.339517  | -1.357174 |
| 20               | 1                | 0              | -3.218739                        | 1.512349  | -1.121690 |
| 21               | 1                | 0              | 4.956662                         | 0.064058  | 0.446212  |
| 22               | 1                | 0              | 4.249214                         | 0.082817  | -1.180520 |

|    |   |   |           |          |           |
|----|---|---|-----------|----------|-----------|
| 23 | 6 | 0 | -4.398743 | 1.098335 | 0.675890  |
| 24 | 6 | 0 | 3.780269  | 1.843931 | 0.032507  |
| 25 | 1 | 0 | -5.153612 | 1.864366 | 0.475699  |
| 26 | 1 | 0 | -3.680498 | 1.533982 | 1.375044  |
| 27 | 1 | 0 | -4.914143 | 0.260302 | 1.157129  |
| 28 | 1 | 0 | 4.669818  | 2.406861 | -0.264572 |
| 29 | 1 | 0 | 2.959338  | 2.188614 | -0.601792 |
| 30 | 1 | 0 | 3.572223  | 2.103097 | 1.076224  |

.....  
 (Z)-H2Et2-H+.log  
 .....

| Center<br>Number | Atomic<br>Number | Atomic<br>Type | Coordinates (Angstroms) |           |           |
|------------------|------------------|----------------|-------------------------|-----------|-----------|
|                  |                  |                | X                       | Y         | Z         |
| 1                | 6                | 0              | -0.503826               | 2.290420  | -0.143822 |
| 2                | 6                | 0              | 0.824303                | 2.247617  | -0.339739 |
| 3                | 1                | 0              | -0.993147               | 3.236809  | -0.359600 |
| 4                | 1                | 0              | 1.269629                | 3.166134  | -0.718759 |
| 5                | 6                | 0              | -1.459060               | 1.225719  | 0.345880  |
| 6                | 6                | 0              | 1.853535                | 1.158663  | -0.151918 |
| 7                | 1                | 0              | -1.452632               | 1.134956  | 1.438401  |
| 8                | 1                | 0              | -2.476960               | 1.479663  | 0.046064  |
| 9                | 1                | 0              | 2.753042                | 1.622780  | 0.273527  |
| 10               | 1                | 0              | 2.154827                | 0.784326  | -1.140506 |
| 11               | 7                | 0              | -1.123195               | -0.136764 | -0.193702 |
| 12               | 7                | 0              | 1.411764                | -0.001898 | 0.653354  |
| 13               | 6                | 0              | -1.997540               | -1.271773 | 0.271546  |
| 14               | 1                | 0              | -1.951252               | -1.273255 | 1.364215  |
| 15               | 1                | 0              | -1.516614               | -2.186817 | -0.085275 |
| 16               | 6                | 0              | -3.433377               | -1.181228 | -0.231212 |
| 17               | 1                | 0              | -1.137072               | -0.093345 | -1.216714 |
| 18               | 6                | 0              | 2.325509                | -1.178076 | 0.589898  |
| 19               | 1                | 0              | 1.839279                | -1.982704 | 1.151789  |
| 20               | 1                | 0              | 2.366462                | -1.497668 | -0.457766 |
| 21               | 6                | 0              | 3.735229                | -0.943800 | 1.134397  |
| 22               | 1                | 0              | 1.349059                | 0.295286  | 1.628630  |
| 23               | 1                | 0              | -0.072941               | -0.282172 | 0.124004  |
| 24               | 1                | 0              | 4.301538                | -1.879457 | 1.104560  |
| 25               | 1                | 0              | 4.291754                | -0.206431 | 0.548682  |
| 26               | 1                | 0              | 3.707724                | -0.608179 | 2.177363  |
| 27               | 1                | 0              | -3.976745               | -2.076133 | 0.084002  |
| 28               | 1                | 0              | -3.966367               | -0.317158 | 0.173747  |
| 29               | 1                | 0              | -3.475363               | -1.141258 | -1.325131 |

.....  
 (Z)-Me4-2H+.log  
 .....

| Center<br>Number | Atomic<br>Number | Atomic<br>Type | Coordinates (Angstroms) |   |   |
|------------------|------------------|----------------|-------------------------|---|---|
|                  |                  |                | X                       | Y | Z |

|    |   |   |           |           |           |
|----|---|---|-----------|-----------|-----------|
| 1  | 1 | 0 | 1.153405  | -0.071780 | -2.079579 |
| 2  | 1 | 0 | -1.153360 | -0.071745 | -2.079601 |
| 3  | 6 | 0 | 0.670078  | -0.286143 | -1.126399 |
| 4  | 6 | 0 | -0.670058 | -0.286123 | -1.126412 |
| 5  | 6 | 0 | 1.588707  | -0.689622 | -0.001969 |
| 6  | 1 | 0 | 1.800104  | -1.763841 | -0.051136 |
| 7  | 1 | 0 | 1.189254  | -0.470251 | 0.992237  |
| 8  | 6 | 0 | -1.588720 | -0.689575 | -0.001998 |
| 9  | 1 | 0 | -1.189285 | -0.470203 | 0.992214  |
| 10 | 1 | 0 | -1.800134 | -1.763792 | -0.051161 |
| 11 | 7 | 0 | 2.940659  | 0.002920  | -0.085426 |
| 12 | 7 | 0 | -2.940658 | 0.002987  | -0.085492 |
| 13 | 1 | 0 | 3.299545  | -0.150702 | -1.034932 |
| 14 | 1 | 0 | -3.299527 | -0.150641 | -1.035004 |
| 15 | 6 | 0 | 3.942866  | -0.623387 | 0.860322  |
| 16 | 1 | 0 | 4.902210  | -0.121894 | 0.730581  |
| 17 | 1 | 0 | 3.587240  | -0.489985 | 1.882710  |
| 18 | 1 | 0 | 4.040142  | -1.683639 | 0.624770  |
| 19 | 6 | 0 | 2.852001  | 1.496178  | 0.118684  |
| 20 | 1 | 0 | 3.839249  | 1.929504  | -0.044214 |
| 21 | 1 | 0 | 2.139635  | 1.915311  | -0.591666 |
| 22 | 1 | 0 | 2.528217  | 1.684444  | 1.143245  |
| 23 | 6 | 0 | -3.942896 | -0.623291 | 0.860242  |
| 24 | 1 | 0 | -4.040165 | -1.683550 | 0.624721  |
| 25 | 1 | 0 | -3.587304 | -0.489855 | 1.882638  |
| 26 | 1 | 0 | -4.902236 | -0.121801 | 0.730453  |
| 27 | 6 | 0 | -2.851983 | 1.496247  | 0.118604  |
| 28 | 1 | 0 | -3.839225 | 1.929582  | -0.044305 |
| 29 | 1 | 0 | -2.528204 | 1.684520  | 1.143165  |
| 30 | 1 | 0 | -2.139608 | 1.915366  | -0.591746 |

.....

(Z)-Me4-H+.log

.....

| Center Number | Atomic Number | Atomic Type | Coordinates (Angstroms) |           |           |
|---------------|---------------|-------------|-------------------------|-----------|-----------|
|               |               |             | X                       | Y         | Z         |
| 1             | 6             | 0           | -0.632949               | 1.974926  | -0.143241 |
| 2             | 6             | 0           | 0.708079                | 1.945505  | -0.107731 |
| 3             | 1             | 0           | -1.153279               | 2.836463  | 0.265963  |
| 4             | 1             | 0           | 1.225275                | 2.794067  | 0.333253  |
| 5             | 6             | 0           | -1.490843               | 0.889847  | -0.749077 |
| 6             | 6             | 0           | 1.567398                | 0.823654  | -0.653663 |
| 7             | 1             | 0           | -2.545052               | 1.176428  | -0.778289 |
| 8             | 1             | 0           | -1.174188               | 0.664521  | -1.772845 |
| 9             | 1             | 0           | 2.627875                | 1.110306  | -0.618124 |
| 10            | 1             | 0           | 1.321680                | 0.654031  | -1.709840 |
| 11            | 7             | 0           | -1.392656               | -0.419425 | 0.013847  |
| 12            | 7             | 0           | 1.360964                | -0.469936 | 0.058872  |
| 13            | 6             | 0           | -1.966609               | -0.314012 | 1.390446  |

|    |   |   |           |           |           |
|----|---|---|-----------|-----------|-----------|
| 14 | 1 | 0 | -1.483969 | 0.508920  | 1.916976  |
| 15 | 1 | 0 | -1.785548 | -1.248930 | 1.922542  |
| 16 | 1 | 0 | -3.041610 | -0.132268 | 1.322231  |
| 17 | 6 | 0 | -2.009828 | -1.548036 | -0.746052 |
| 18 | 1 | 0 | -3.073713 | -1.351264 | -0.896086 |
| 19 | 1 | 0 | -1.514378 | -1.644673 | -1.713092 |
| 20 | 1 | 0 | -1.885325 | -2.470491 | -0.177074 |
| 21 | 6 | 0 | 1.888847  | -0.400672 | 1.438828  |
| 22 | 1 | 0 | 1.400713  | 0.408497  | 1.987347  |
| 23 | 1 | 0 | 1.691458  | -1.344486 | 1.953500  |
| 24 | 1 | 0 | 2.973807  | -0.221579 | 1.446243  |
| 25 | 6 | 0 | 2.014264  | -1.571988 | -0.678046 |
| 26 | 1 | 0 | 1.837534  | -2.515037 | -0.154655 |
| 27 | 1 | 0 | 3.100148  | -1.420455 | -0.760369 |
| 28 | 1 | 0 | 1.598561  | -1.646046 | -1.686830 |
| 29 | 1 | 0 | -0.316391 | -0.591709 | 0.095382  |

---
